# Supplementary material for: Emergence of fosA3 and blaCTX–M–14 in Multidrug-Resistant Citrobacter freundii Isolates From Flowers and the Retail Environment in China
Source: PubMed Central journal article supplement (PMC7893115; doi:10.3389/fmicb.2021.586504), 2021-02-05
Supplement: Data_Sheet_1.pdf [file Data_Sheet_1.pdf]

## Supplementary Information for

### **Title: Emergence of *fosA3* and *bla*<sub>CTX-M-14</sub> in multidrug-resistant *Citrobacter freundii* isolates from flowers and their surrounding environments in China**

**Ke Cheng<sup>1†</sup>, Liang-Xing Fang<sup>1,3†</sup>, Bing He<sup>1</sup>, Qian-wen Ge<sup>1</sup>, Jia-qi Lu<sup>1</sup>, Zi-xing Zhong<sup>1</sup>, Xi-ran Wang<sup>1</sup>, Yang Yu<sup>1,3</sup>, Xin-lei Lian<sup>1,3</sup>, Xiao-Ping Liao<sup>1,2,3</sup>, Jian Sun<sup>1,2,3\*</sup>, Ya-Hong Liu<sup>1,2,3,4\*</sup>**

<sup>1</sup>National Risk Assessment Laboratory for Antimicrobial Resistance of Animal Original Bacteria, South China Agricultural University, Guangzhou 510642, China

<sup>2</sup>Guangdong Laboratory for Lingnan Modern Agriculture, Guangzhou 510642, China

<sup>3</sup>Guangdong Provincial Key Laboratory of Veterinary Pharmaceutics Development and Safety Evaluation, South China Agricultural University, Guangzhou 510642, China

<sup>4</sup>Jiangsu Co-Innovation Center for the Prevention and Control of Important Animal Infectious Disease and Zoonosis, Yangzhou University, Yangzhou 225009, PR China

<sup>†</sup>Both authors contributed equally to this work

\*Corresponding Author

Jian Sun, PhD, Laboratory of Veterinary Pharmacology, College of Veterinary Medicine, South China Agricultural University, Guangzhou 510642, PR. China. E-mail: [jiansun@scau.edu.cn](mailto:jiansun@scau.edu.cn). Tel: +86-020-85285507; Fax: +86-020-85285507

Ya-Hong Liu, PhD, Laboratory of Veterinary Pharmacology, College of Veterinary Medicine, South China Agricultural University, Guangzhou 510642, PR. China. E-mail: [lyh@scau.edu.cn](mailto:lyh@scau.edu.cn). Tel: +86-20-85280006; Fax: +86-20-85280006

**Table S1. Antimicrobial susceptibility testing among 11 *fosA3*-positive *Citrobacter freundii* isolates and their corresponding transconjugants (MICs, µg/mL).**

|                | FOS  | CTX  | AMC | MEM   | TIG  | TET | CTET | DOX | CIP   | GEN | AMK  | SXT | FFC | CHL | RIF  | CS   |
|----------------|------|------|-----|-------|------|-----|------|-----|-------|-----|------|-----|-----|-----|------|------|
| H12-3-2        | >512 | 128  | 64  | 0.016 | 1    | 128 | 128  | 32  | 32    | 128 | >256 | 320 | 256 | 128 | 256  | 1    |
| <u>H12-3-2</u> | >512 | 64   | 4   | 0.016 | 0.25 | 2   | 2    | 1   | 0.016 | 1   | 1    | 2.5 | 2   | 2   | 4    | 0.25 |
| H41-7-2        | >512 | 128  | 64  | 0.016 | 1    | 128 | 64   | 32  | 32    | 128 | >256 | 320 | 256 | 128 | 256  | 1    |
| <u>H47-1-2</u> | >512 | 64   | 4   | 0.016 | 0.25 | 2   | 2    | 1   | 0.016 | 1   | 1    | 2.5 | 2   | 2   | 4    | 0.25 |
| <u>HR5</u>     | >512 | 128  | 64  | 0.016 | 1    | 128 | 128  | 32  | 32    | 128 | >256 | 320 | 256 | 128 | 256  | 1    |
| <u>HR5</u>     | >512 | 64   | 4   | 0.016 | 0.25 | 2   | 2    | 1   | 0.016 | 1   | 1    | 2.5 | 2   | 2   | 4    | 0.25 |
| N21-1          | >512 | 128  | 64  | 0.016 | 1    | 128 | 128  | 32  | 32    | 128 | >256 | 320 | 256 | 128 | 256  | 1    |
| <u>N21-1</u>   | >512 | 64   | 4   | 0.016 | 0.25 | 2   | 2    | 1   | 0.016 | 1   | 1    | 2.5 | 2   | 2   | 4    | 0.25 |
| N52-2          | >512 | 128  | 64  | 0.016 | 1    | 128 | 128  | 32  | 32    | 128 | >256 | 320 | 256 | 128 | 256  | 1    |
| <u>N52-2</u>   | >512 | 64   | 4   | 0.016 | 0.25 | 2   | 2    | 1   | 0.016 | 1   | 1    | 2.5 | 2   | 2   | 4    | 0.25 |
| N89-1-1        | >512 | 128  | 64  | 0.016 | 1    | 256 | 128  | 32  | 32    | 128 | >256 | 320 | 256 | 128 | 256  | 1    |
| <u>N89-1-1</u> | >512 | 64   | 4   | 0.016 | 0.25 | 2   | 2    | 1   | 0.016 | 1   | 1    | 2.5 | 2   | 2   | 4    | 0.25 |
| NW2-2          | >512 | 128  | 64  | 0.016 | 1    | 128 | 128  | 32  | 32    | 128 | >256 | 320 | 256 | 128 | 256  | 1    |
| <u>NW2-2</u>   | >512 | 64   | 4   | 0.016 | 0.25 | 2   | 2    | 1   | 0.016 | 1   | 1    | 2.5 | 2   | 2   | 4    | 0.25 |
| S66-1-1        | >512 | 128  | 64  | 0.016 | 1    | 128 | 128  | 32  | 32    | 128 | >256 | 320 | 256 | 128 | 256  | 1    |
| <u>S66-1-1</u> | >512 | 32   | 4   | 0.016 | 0.25 | 2   | 2    | 1   | 0.016 | 1   | 1    | 2.5 | 2   | 2   | 4    | 0.25 |
| S40-1-2        | >512 | 128  | 64  | 0.016 | 1    | 128 | 128  | 32  | 32    | 128 | >256 | 320 | 256 | 128 | 256  | 1    |
| <u>S40-1-2</u> | >512 | 64   | 4   | 0.016 | 0.25 | 2   | 2    | 1   | 0.016 | 1   | 1    | 2.5 | 2   | 2   | 4    | 0.25 |
| <u>S39</u>     | >512 | 128  | 32  | 0.03  | 1    | 256 | 128  | 32  | 16    | 128 | 1    | 320 | 256 | 256 | >256 | 1    |
| <u>S39</u>     | >512 | 64   | 4   | 0.016 | 0.25 | 64  | 128  | 16  | 0.5   | 128 | 1    | 320 | 2   | 64  | 64   | 0.25 |
| S45-1          | >512 | 128  | 32  | 0.03  | 1    | 256 | 128  | 32  | 16    | 128 | 1    | 320 | 256 | 256 | >256 | 1    |
| <u>S45-1</u>   | >512 | 64   | 4   | 0.016 | 0.25 | 64  | 128  | 16  | 0.5   | 64  | 1    | 320 | 2   | 64  | 64   | 0.25 |
| C600           | 4    | 0.03 | 4   | 0.016 | 0.25 | 1   | 2    | 1   | 0.016 | 2   | 1    | 5   | 1   | 2   | 2    | 0.25 |
| 25922          | 2    | 0.03 | 4   | 0.016 | 0.25 | 2   | 2    | 1   | 0.016 | 1   | 1    | 2.5 | 2   | 2   | 2    | 0.25 |

<sup>1</sup> FOS, fosfomycin; FFC, florfenicol; CTX, cefotaxime; AMC, amoxicillin-clavulanate; MEM, meropenem; TIG, tigecycline; TET, tetracycline; CTET, chlortetracycline; DOX, doxycycline; CIP, ciprofloxacin; GEN, gentamicin; AMK, amikacin; SXT, sulfamethoxazole/trimethoprim; CHL, chloramphenicol; RIF, rifampicin

<sup>2</sup> Transconjugants that were co-transferred by conjugation are underlined.

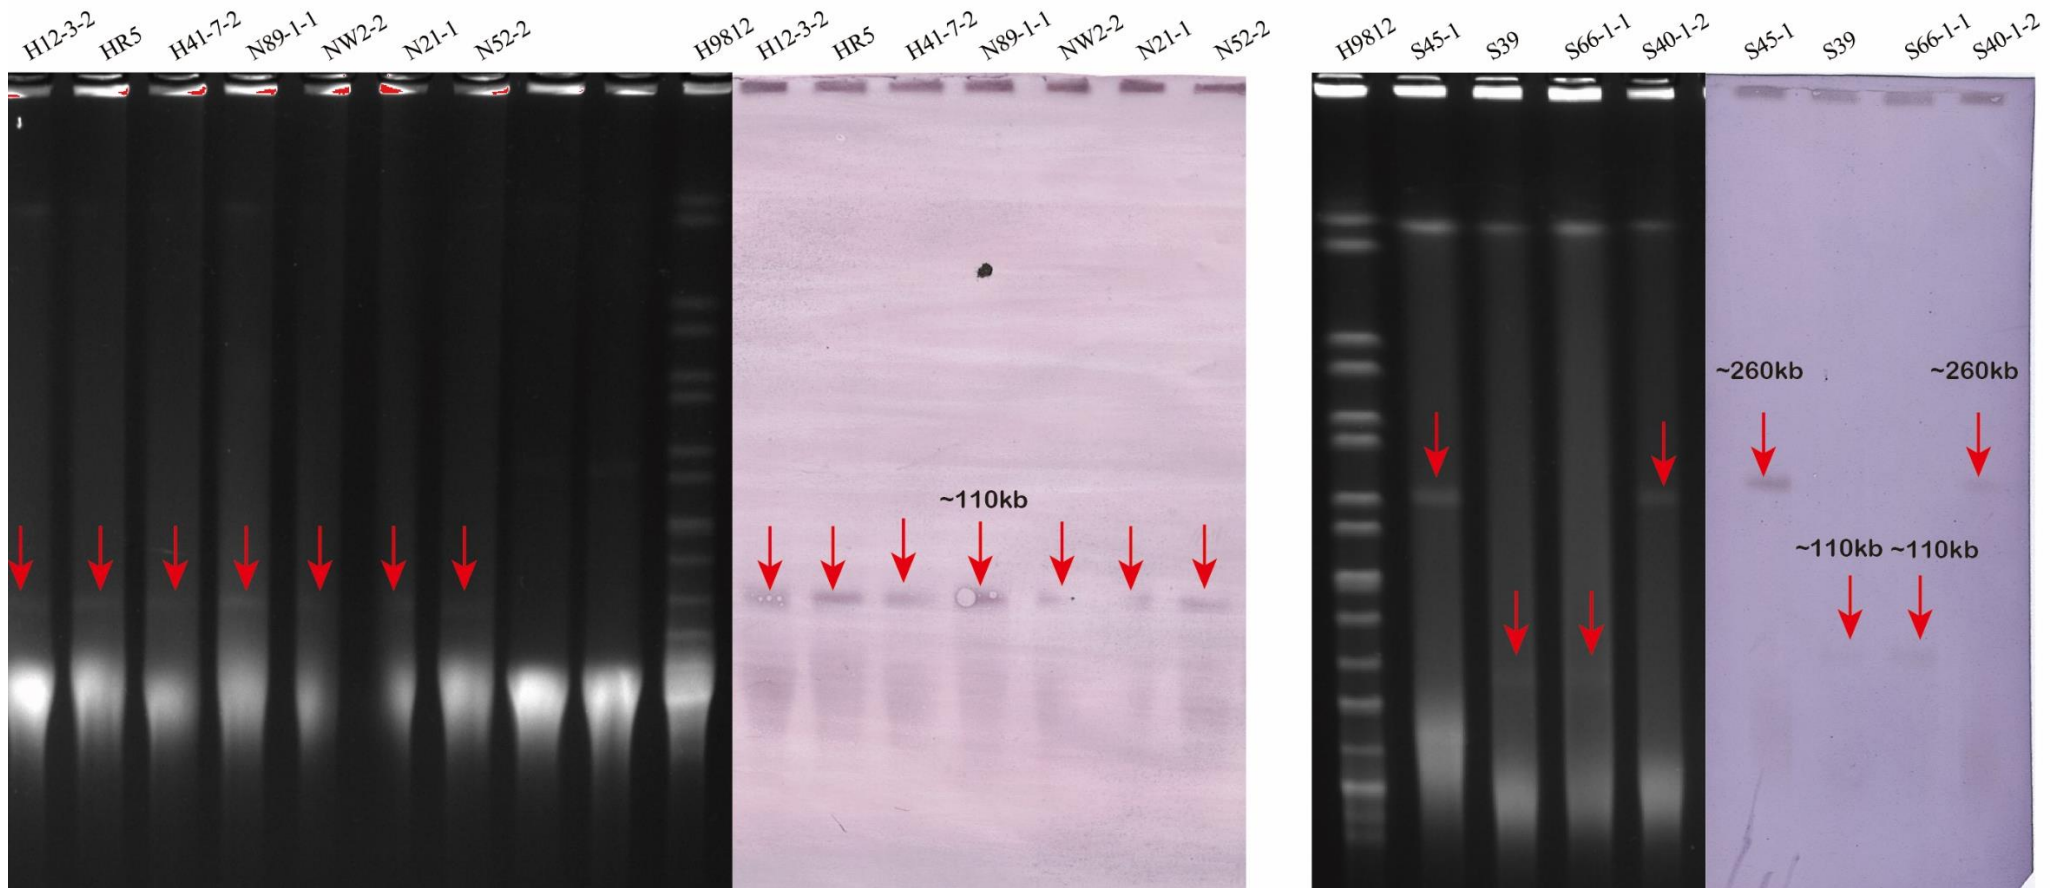

**Figure S1.** S1-PFGE and Southern blots hybridization profiles of *fosA3*-carrying plasmids in the 11 transformants.
